# Supplementary material for: The practical use of surface electromyography during running: does the evidence support the hype? A narrative review
Source: PubMed Central journal article supplement — BMJ Open Sport Exerc Med. 2015 Dec 17;1(1):e000026. doi: 10.1136/bmjsem-2015-000026 (PMC5117013; doi:10.1136/bmjsem-2015-000026), 2015-12-17
Supplement: supp_1.1.e000026_bmjsem-2015-000026supp.pdf [file supp_1.1.e000026_bmjsem-2015-000026supp.pdf]

| Study                | Demographics                                                                                                                                        | EMG Equipment and Techniques                                                                                                                                                                                                                                                 | Design                                                                                                                                                                                                                                                                            | Methods                                                                                                                                                                                                                                                                                                                                                                                                                                                                                                                                                                                                                                                | Outcomes                                                                                                                                                                                                                                                                                                                                                                                                                                                                                                                                                                                                                                                                                                                                                                                                                                                                                                                                                                                                                                                                                                                                                                 |
|----------------------|-----------------------------------------------------------------------------------------------------------------------------------------------------|------------------------------------------------------------------------------------------------------------------------------------------------------------------------------------------------------------------------------------------------------------------------------|-----------------------------------------------------------------------------------------------------------------------------------------------------------------------------------------------------------------------------------------------------------------------------------|--------------------------------------------------------------------------------------------------------------------------------------------------------------------------------------------------------------------------------------------------------------------------------------------------------------------------------------------------------------------------------------------------------------------------------------------------------------------------------------------------------------------------------------------------------------------------------------------------------------------------------------------------------|--------------------------------------------------------------------------------------------------------------------------------------------------------------------------------------------------------------------------------------------------------------------------------------------------------------------------------------------------------------------------------------------------------------------------------------------------------------------------------------------------------------------------------------------------------------------------------------------------------------------------------------------------------------------------------------------------------------------------------------------------------------------------------------------------------------------------------------------------------------------------------------------------------------------------------------------------------------------------------------------------------------------------------------------------------------------------------------------------------------------------------------------------------------------------|
| 1.Nummela et al 1993 | <p>Age range 20-28(25+/-3yrs)</p> <p>Mean Height 1.83+/-0.06m</p> <p>Mean Weight 73+/- 6kg</p> <p>All male</p>                                      | <p>Bipolar surface electrodes</p> <p>Constant electrode distance 20mm on each muscle belly</p> <p>Electrode places marked for each day</p> <p>EMG transmitter fixed with belt to waist. Extra load 1.8kgs</p> <p>EMG activity was amplified and recorded telemetrically)</p> | <p>10 sprinters 400m runners/hurdlers</p> <p>All male</p> <p>EMG successfully recorded in 7/10 participants</p> <p>Outdoor track</p> <p>4x leg muscles of the right leg</p> <p>Gastrocnemius medialis GAm<br/>Biceps Femoris BF<br/>Vastus Lateralis VL<br/>Rectus Femoris RF</p> | <p>Two 400m runs performed separately on two successive days on outdoor track</p> <p>Day One: subjects ran a maximal 20m, with a flying start over 40m followed by a 400m time trial with maximum effort.</p> <p>Day Two: subjects ran sub-maximal 20m runs with a flying start at the average speed of the first 100m during the 400m run on the previous day.</p> <p>The maximal and sub-maximal 20m runs were run 3-5 times and the 400m only once.</p> <p>Non-smoothed EMG signals were rectified, integrated and averaged (AEMG) for three phases of running: the pre-activation (50ms prior to ground phase), braking and propulsion phases.</p> | <p>The role of central and peripheral fatigue was evaluated by comparing maximal sprint running in fatigued and non-fatigued conditions.</p> <p>AEMG of RF increased significantly during the submaximal 20m run to the end of 400m during in the braking phase (<math>p&lt;0.05</math>) no significant changes were seen in the other three muscles.</p> <p>Comparison of the two maximal conditions, maximal 20m and the 400m AEMG of GAm and BF were significantly greater during non-fatigued condition in the propulsion phase (<math>p&lt;0.001</math>) and (<math>p&lt;0.05</math>) respectively.</p> <p>The AEMG of all the muscles differed significantly between the different runs in the braking (<math>p&lt;0.01</math>), the propulsion (<math>p&lt;0.05</math>) and the pre-activation phase (<math>p&lt;0.05</math>). The increase in AEMG was 28% in the braking phase and 8% in the propulsion phase.</p> <p>There was a significant difference in the EMG activity in BF and GAm in the propulsion phase between fatigued 400m run and non-fatigued and maximal 20m-run.</p> <p>The AEMG of RF and VL did not differ between these two conditions</p> |
| 2.Nummela et al 1992 | <p>Mean age 23.7<br/>S.D 3.5</p> <p>Mean Height 186cm<br/>S.D 5</p> <p>Mean BM 75kg<br/>SD 7</p> <p>All male<br/>Mean Training years 6<br/>SD 2</p> | <p>Bipolar surface electrodes</p> <p>Constant electrode distance 20mm</p> <p>Placed longitudinally over motor point of muscles</p> <p>EMG transmitter fixed with belt. Extra load 3kgs</p>                                                                                   | <p>6 sprinters All male</p> <p>Gastrocnemius medialis GAm, biceps femoris, BF rectus femoris, RF vastus lateralis, VL</p> <p>One Leg: Right Leg</p> <p>Only GAm and VL used in final analysis</p> <p>Mean Training years 6</p>                                                    | <p>Two days of 200m on indoor track</p> <p>Day One: subjects ran a maximum speed test over 200m and 400m</p> <p>Day 2: subjects 100m and 300m with 20m flying start on each day.</p> <p>A rest period of five hours between runs was allocated on each day.</p> <p>Before the 400m sprint and immediately after each run, the subjects performed drop jumps</p>                                                                                                                                                                                                                                                                                        | <p>EMG recordings were measured during all runs and drop jumps. A loose sole with a special switch was used to determine contact times during all runs.</p> <p>EMG and EMG:running velocity ratio increased progressively with running distance.</p> <p>EMG activity was greatest in both muscles during the ground reaction phase of the 400m sprint (<math>p&lt;0.05</math>).</p> <p>Both the EMG:force ratio in drop jumps and EMG:running speed ratio increased during the second half of the 400m, suggesting primary cause of fatigue in the 400m sprint is related to skeletal muscle and not centrally.</p>                                                                                                                                                                                                                                                                                                                                                                                                                                                                                                                                                      |

|                          |                                                                                                                                                |                                                                                                                                                                                                                                                                                     |                                                                                                                                                                                                                                                                                                        |                                                                                                                                                                                                                                                                                                                                            |                                                                                                                                                                                                                                                                                                                                                                                                                                                                                                                                                                                                                                                                                                                                                                                                                                                                                                                |
|--------------------------|------------------------------------------------------------------------------------------------------------------------------------------------|-------------------------------------------------------------------------------------------------------------------------------------------------------------------------------------------------------------------------------------------------------------------------------------|--------------------------------------------------------------------------------------------------------------------------------------------------------------------------------------------------------------------------------------------------------------------------------------------------------|--------------------------------------------------------------------------------------------------------------------------------------------------------------------------------------------------------------------------------------------------------------------------------------------------------------------------------------------|----------------------------------------------------------------------------------------------------------------------------------------------------------------------------------------------------------------------------------------------------------------------------------------------------------------------------------------------------------------------------------------------------------------------------------------------------------------------------------------------------------------------------------------------------------------------------------------------------------------------------------------------------------------------------------------------------------------------------------------------------------------------------------------------------------------------------------------------------------------------------------------------------------------|
|                          |                                                                                                                                                | Wired system EMG signals stored on magnetic tape                                                                                                                                                                                                                                    | SD2                                                                                                                                                                                                                                                                                                    | from a height of 39cm.                                                                                                                                                                                                                                                                                                                     |                                                                                                                                                                                                                                                                                                                                                                                                                                                                                                                                                                                                                                                                                                                                                                                                                                                                                                                |
| 3.Mastalerz et al 2012   | Mean age 24+/-2yrs<br><br>Mean BM72+/-2.2kg<br><br>Mean<br><br>Height177+/-1.3cm<br>All male                                                   | Self adhesive, disposable, surface electrodes<br><br>Skin shaved, cleaned with isopropyl alcohol,abraded with coarse gauze<br><br>Electrode placement Validated by Winter et al 8mm diameter, 20mm intraelectrode distance<br><br>SEMG signal amplified and recorded telemetrically | 4 professional 400m runners<br><br>Rectus Femoris RF<br>Biceps Femoris BF both legs                                                                                                                                                                                                                    | Subjects ran a 400m run at four different intensities timed at every 100m on an indoor athletic tartan track.<br><br>Need to add more here                                                                                                                                                                                                 | Mean power frequency (MPF) increased by 23.6% biceps femoris (BF) and 19.5% rectus femoris (RF) in left leg compared with 17.5% (BF) and 12.5% (RF) in right leg.<br><br>During the run with maximum intensity, a 30% difference between left and right BF and 11% for RF fatigue was observed in the first 25 seconds and decreased to 3% for BF and 9% for RF after the 25 <sup>th</sup> second of the testing.<br><br>Increases in fatigue measured by EMG activity were only seen in highest velocity run.<br><br>Greater fatigue was noted in the left limb compared to the right during the 400m run on the tartan track.<br><br>The differences between both legs and the more substantial load on the BF is likely due to the result of the curving part of the track. This effect was also observed in RF but not as significantly.                                                                   |
| 4.Paavolainen et al 1999 | Mean Age<br>HC23.8+/-3.6<br>LC 24.3+/-2.8<br><br>Mean BM<br>HC68.5+/-6.2<br>LC 71.3+/-6.0<br><br>Mean Height<br>HC178.9+/-6.1<br>LC180.1+/-4.3 | Beckman miniature skin electrodes<br><br>Skin dry shaved, rubbed with sandpaper, cleaned with alcohol<br><br>Electrodes positioned longitudinally over belly of the muscle<br><br>Intra-electrode distance of 20mm<br><br>EMG signals amplified and recorded telemetrically         | 19 athletes<br><br>9 high calibre (HC) and 10 low calibre(LC) runners/orienteers<br><br>Indoor Track<br><br>Vastus lateralis VL, Rectus Femoris RF,Biceps Femoris BF, Gastrocnemius medialis GAm measured<br>One Leg: Right leg<br><br>19 elite cross-country runners<br><br>Background Training years | 10k using a 200m distance on an indoor track with a 9.4m long force platform system consisting of five 2D and 3D force plates.<br><br>At the beginning of the 10k and after running 3,5,7 and 9km all subjects ran a 200m constant velocity lap at a speed of 4.5km/s. The athletes ran 20m before and 20m after the 10K at maximal speed. | In the maximal 20m runs the average integrated EMG (IEMG) of VL, BF and GA during the pre contact and contact phases were 28.5-57.2% lower (p<0.001) from the 20m after to the 20m before.<br><br>The IEMG:force ratio of the total contact, braking and propulsion phases decreased by 35.1-13.5% (p<0.05-0.001) from 20m before to 20m after. No differences were seen within each group. During the constant velocity the average IEMG activity in VL increased with no changes in BF or GA.<br><br>No significant changes occurred in the IEMG:force ratio during the constant velocity lap. The EMG measurements for RF during the constant velocity laps and the after lap were successful for only 11/19 subjects leaving only the remaining three muscles for testing.<br><br>The decreased IEMG:force ratio under these experimental conditions may not only be peripheral but have a central origin. |

|                          |                                                                                                   |                                                                                                                                                                                                                                                                                                                                                                                                                                           |                                                                                                                                                               |                                                                                                                                                                                                                                                                                                                                                                                                                                                                                                                                                                                                                    |                                                                                                                                                                                                                                                                                                                                                                                                                                                                                                                                                                                                                                                                                                                                                                                                                                                                                                                                                                                                                                                                                                                                                                                                                                |
|--------------------------|---------------------------------------------------------------------------------------------------|-------------------------------------------------------------------------------------------------------------------------------------------------------------------------------------------------------------------------------------------------------------------------------------------------------------------------------------------------------------------------------------------------------------------------------------------|---------------------------------------------------------------------------------------------------------------------------------------------------------------|--------------------------------------------------------------------------------------------------------------------------------------------------------------------------------------------------------------------------------------------------------------------------------------------------------------------------------------------------------------------------------------------------------------------------------------------------------------------------------------------------------------------------------------------------------------------------------------------------------------------|--------------------------------------------------------------------------------------------------------------------------------------------------------------------------------------------------------------------------------------------------------------------------------------------------------------------------------------------------------------------------------------------------------------------------------------------------------------------------------------------------------------------------------------------------------------------------------------------------------------------------------------------------------------------------------------------------------------------------------------------------------------------------------------------------------------------------------------------------------------------------------------------------------------------------------------------------------------------------------------------------------------------------------------------------------------------------------------------------------------------------------------------------------------------------------------------------------------------------------|
|                          |                                                                                                   |                                                                                                                                                                                                                                                                                                                                                                                                                                           | HC 9.1+/-3.2<br>LC9.0+/-2.4                                                                                                                                   |                                                                                                                                                                                                                                                                                                                                                                                                                                                                                                                                                                                                                    |                                                                                                                                                                                                                                                                                                                                                                                                                                                                                                                                                                                                                                                                                                                                                                                                                                                                                                                                                                                                                                                                                                                                                                                                                                |
| 5. Rahnema et al<br>2006 | Mean age 21.4+/-3.1 yrs<br><br>Mean BM 74.5+/-8.5 kg<br><br>Mean Height 1.77+/-0.06 m             | Two electrodes per muscle<br><br>Bipolar surface electrodes 20mm diameter<br><br>Skin shaved, washed with alcohol, lightly abraded<br><br>20mm intraelectrode distance<br><br>RF midway between ASIS and superior border of patella<br><br>BF: Long head, midway between ischial tuberosity and lateral condyle of femur<br><br>TA over greatest area of muscle bulk<br><br>Gastrocnemius, lateral head over greatest area of muscle bulk | 10 amateur soccer players<br><br>Treadmill testing<br><br>Rectus femoris, RF, Biceps Femoris BF, Tibialis Anterior, TA, Gastrocnemius measured<br><br>One leg | Soccer specific intermittent exercise protocol. This included walking, jogging, running and sprinting.<br><br>The speeds of these were 6km/h, 12km/h, 15km/h and 21km/h respectively. The total time was 90mins with a 15 minute interval. Each half was 45 minutes - 22 minutes in duration, followed by 1 minutes rest and then a second 22 minutes, to simulate a soccer match.<br><br>Two sessions were carried out using fatigue and control sessions.<br><br>During the first session the subjects performed a warm-up including soccer specific stretching exercises and running at low speed on treadmill. | The EMG activity was recorded for 5 s at each of the speeds 6, 12, 15 and 21 km/h. All tests were carried out at the same time of day to remove circadian variables.<br><br>During the first session the subjects performed a warm-up including soccer specific stretching exercises and running at low speed on treadmill. The subject then performed the EMG measurement treadmill protocol for the soccer specific exercises.<br><br>During the second session, a control test was performed where the same warm up was conducted followed by the EMG measurement protocol. The subjects then rested for 45 minutes before repeating the protocol. They had another 45 minute before the final EMG measurements were taken.<br><br>Each muscle showed a statistically significant increase in EMG activity as speed increased in each condition (exercise and control) ( $p < 0.001$ ). RF ( $p < 0.05$ ), BF ( $p < 0.01$ ) & TA ( $p < 0.05$ ) all decreased activity at each fatigue state, but not GA. After simulation of soccer on treadmill, EMG activity in major lower limb muscles was less than before. This decrease suggests that exercise had an effect on muscle activity even when work rate was sustained. |
| 6. Patras et al<br>2011  | All male<br><br>Mean Age 24.8+/-5.3<br><br>Mean BM 77.3+/-7.5 kg<br><br>Mean Height 1.77+/-5.3 cm | Pre-gelled<br>Skin shaved and rubbed with abrasive paper<br><br>20mm fixed intra-electrode distance<br><br>10mm diameter                                                                                                                                                                                                                                                                                                                  | 14 amateur soccer players<br><br>All had ACL reconstructed knees<br><br>Treadmill testing<br><br>Vastus Lateralis Both Legs                                   | In the first visit to the laboratory, the players performed a GXT test to volitional exhaustion to determine $\dot{V}O_{2max}$ , lactate threshold.<br><br>Testing was performed after a warm up of 3 minutes walking at self-selected speed followed by 5 mins jogging at 8km/hr. The incremental test began at speed of                                                                                                                                                                                                                                                                                          | EMG levels for the intact leg strongly correlated with lactate threshold ( $r = 0.77$ , $p = 0.001$ and velocity at 4mM ( $r = 0.68$ , $p = 0.008$ ).<br><br>Final EMG for the reconstructed leg had moderate relationship with lactate threshold ( $r = 0.47$ , $p = 0.09$ and velocity at 4mM ( $r = 0.52$ , $p = 0.06$ ) which was not statistically significant.<br><br>The EMG response of the intact leg showed a strong relationship to endurance markers, whereas reconstructed leg                                                                                                                                                                                                                                                                                                                                                                                                                                                                                                                                                                                                                                                                                                                                    |

|                     |                                                                                        |                                                                                                               |                                                                                                                                                                                                |                                                                                                                                                                                                                                                                                                                                                                                                            |                                                                                                                                                                                                                                                                                                                                                                                                                                                                                                                                                                                                                                                                                                                                                                                                                                                                                                                                                                                                             |
|---------------------|----------------------------------------------------------------------------------------|---------------------------------------------------------------------------------------------------------------|------------------------------------------------------------------------------------------------------------------------------------------------------------------------------------------------|------------------------------------------------------------------------------------------------------------------------------------------------------------------------------------------------------------------------------------------------------------------------------------------------------------------------------------------------------------------------------------------------------------|-------------------------------------------------------------------------------------------------------------------------------------------------------------------------------------------------------------------------------------------------------------------------------------------------------------------------------------------------------------------------------------------------------------------------------------------------------------------------------------------------------------------------------------------------------------------------------------------------------------------------------------------------------------------------------------------------------------------------------------------------------------------------------------------------------------------------------------------------------------------------------------------------------------------------------------------------------------------------------------------------------------|
|                     |                                                                                        |                                                                                                               | <p>All with bone patella bone graft-18.5+/-4.3 months before testing</p> <p>Return to sports 6months after reconstruction following widely accepted criteria</p>                               | <p>10km/hr and increased by 2km/hr every 3 minutes.</p> <p>In the second visit EMG activity was recorded from vastus lateralis (VL) bilaterally during 10min run for 15 secs at 3<sup>rd</sup> &amp; 10<sup>th</sup> minute.</p>                                                                                                                                                                           | <p>did not demonstrate relationship, which may indicate that injury and surgery modify ability of local muscles to tolerate high intensity running.</p>                                                                                                                                                                                                                                                                                                                                                                                                                                                                                                                                                                                                                                                                                                                                                                                                                                                     |
| 7. Gefen et al 2002 | <p>2 male: 25, 17</p> <p>2 female:28, 17</p>                                           | <p>Shaved skin, scrubbed with alcohol</p> <p>Surface electrode discs 9mm</p> <p>No exact placement stated</p> | <p>4athletes</p> <p>Treadmill Testing</p> <p>Gastrocnemius lateralis, GAI and medialis GAM, Soleus S, Tibialis anterior TA, Extensor Halucis Longus EHL, Peroneus longus PL</p> <p>One Leg</p> | <p>Marching in athletes was included because a similar method was used to the other studies and importantly the treadmill velocity for the test was 8km/hr, which is the speed of a slow jog or run and faster than a quick walk (~6.5km/hr).</p> <p>The treadmill marching distance was of 2km with 30 inversion/eversion motions of the foot performed pre and post exercise with and without shoes.</p> | <p>The most prominent decrease in EMG signal bursts due to fatigue occur in the LGA and PL muscles which were shown to decrease by 20%. Reductions of 15-20% in duration of signal bursts were observed in MGA and S.</p> <p>The maximum median frequency, MF decrease was recorded for the PL and GAI, fatigue was evident in these muscles after 10 minutes.</p> <p>Due to small numbers single subject designed statistics were designed to test the significance of the substantial drops in of the peroneus longus. Significance was set to 5%. For this analysis marching tasks were divided into three stages of equal duration of approximately 5 minutes. The averaged MF values were recorded at each stage and compared showing a statistical significant drop in in the PL muscle <math>p&lt;0.01</math> from the first stage, the mid-point and to the end.</p> <p>The reductions in activity and decrease in MF of PL and GAI explain changes in gait/force production seen with fatigue.</p> |
| 8.Hanon et al 2005  | <p>Mean age26.8+/-5.13</p> <p>MeanBM65.4+/-2.2kg</p> <p>Mean Height 179.9+/-3.72cm</p> | <p>Bipoloar configuration</p> <p>10mm diameter</p> <p>Skin scraped</p> <p>No exact placement stated</p>       | <p>9 trained athletes</p> <p>Treadmill testing</p> <p>6 muscles GM,BF, VL, RF, TA, GaS</p> <p>One leg</p> <p>All male, well trained 5-7 sessions per week</p>                                  | <p>Treadmill testing with incremental running tests, increasing in speed every four minutes for twenty minutes, with one minute rest intervals between each. One leg was used for EMG recordings with isometric contractions of each muscle used prior to testing</p> <p>Burst EMG and distance integrated EMG (iEMG), readings were during flight (f) and contact (c) phases.</p>                         | <p>On the burst scale, an increase in iEMG between start and end was shown for BF-contact and RF-contact. RF-flight before the end <math>p&lt;0.05</math>. For the distance scale GA was the only muscle not to show an increase in iEMG between the 20m at the start and the 20m at the end.</p> <p>The iEMG increased significantly during the last stage for both VL and TA. For BF-f+c and RF-c this increased significantly during middle and penultimate stages. Different muscles exhaust earlier and are different at different speeds with GA, VL at lower speeds BF and RF and higher speeds.</p> <p>The hip mobilising muscles BF and RF were seen to fatigue</p>                                                                                                                                                                                                                                                                                                                                |

|                   |                                                                                                                                              |                                                                                                                                                                            |                                                                                                                                               |                                                                                                                                                                                                                                                                                                                                                                                                                                                                                                                                                                                                                                                                                                                           |                                                                                                                                                                                                                                                                                                                                                                                                                                                                                                                                                                                                                                                                                                                                                                                                                                                                                                                                                                                                                                                                                                                      |
|-------------------|----------------------------------------------------------------------------------------------------------------------------------------------|----------------------------------------------------------------------------------------------------------------------------------------------------------------------------|-----------------------------------------------------------------------------------------------------------------------------------------------|---------------------------------------------------------------------------------------------------------------------------------------------------------------------------------------------------------------------------------------------------------------------------------------------------------------------------------------------------------------------------------------------------------------------------------------------------------------------------------------------------------------------------------------------------------------------------------------------------------------------------------------------------------------------------------------------------------------------------|----------------------------------------------------------------------------------------------------------------------------------------------------------------------------------------------------------------------------------------------------------------------------------------------------------------------------------------------------------------------------------------------------------------------------------------------------------------------------------------------------------------------------------------------------------------------------------------------------------------------------------------------------------------------------------------------------------------------------------------------------------------------------------------------------------------------------------------------------------------------------------------------------------------------------------------------------------------------------------------------------------------------------------------------------------------------------------------------------------------------|
|                   |                                                                                                                                              |                                                                                                                                                                            |                                                                                                                                               |                                                                                                                                                                                                                                                                                                                                                                                                                                                                                                                                                                                                                                                                                                                           | earlier than the other muscles. This is consistent with the linear increase of stride length and speed and explains the resulting fatigue.                                                                                                                                                                                                                                                                                                                                                                                                                                                                                                                                                                                                                                                                                                                                                                                                                                                                                                                                                                           |
| 9. Mizrahi et al  | <p>Calisthenics twice per week</p> <p>Mean Age:<br/>30.1+/-5.1</p> <p>Mean height:<br/>173.9+/-7.3cm</p> <p>Body Mass<br/>70.4kg+/-9.2Kg</p> | <p>No documented skin preparation</p> <p>Two pairs of small bipolar disposable Ag/AgCl snap sur- face electrodes</p> <p>10mm diameter</p> <p>No exact placement stated</p> | <p>22 males</p> <p>Treadmill Testing</p> <p>Gastrocnemius and quadriceps</p> <p>Right leg</p> <p>EMG successfully recorded in 12 subjects</p> | <p>Each subject was subjected to an incremental load on the treadmill with an increasing speed to determine his anaerobic threshold which was determined non-invasively as the onset of initial increase in each of the ventilatory equivalent for oxygen (WVO2) and ventilatory equivalent for carbon dioxide (VE/VCO2)</p> <p>The running speed was initially 1 m/s and was increased every 30 sec by increments of 0.22 m/s until the point of anaerobic threshold determination.</p> <p>According to PETCO2 by the end of the 30 min of running on the treadmill all subjects were divided into two groups.</p> <p>Surface electrodes were placed over the quadriceps and gastrocnemius muscles of the right leg.</p> | <p>One group (n = 10) had a significant decrease (<math>p &lt; 0.05</math>) of PETCO2 and it was defined as the fatigue group. The other group (n = 12) did not show a significant change of the amount of PETCO2 at the end of the test and was defined as the non-fatigue group. The average speed for the fatigue group (<math>2.76 \pm 0.29</math> m/sec) was not significantly different from the non-fatigue group (<math>2.75 \pm 0.48</math> m/sec).</p> <p>Only twelve of the subjects were instrumented with the surface electrodes for EMG evaluation due to procedural constraints.</p> <p>The mean, root mean square, mean and median frequency were calculated. In the fatigued gastrocnemius group there was a decrease in the time domain, but it was not statistically significant. No change was noted in the frequency domain results.</p> <p>The gastrocnemius data for the non-fatigue group also do not indicate a significant variation with time. As for the case of the gastrocnemius, the data of the quadriceps muscle did not vary significantly with time during the running tests.</p> |
| 10. Mizrahi et al | <p>Mean age</p> <p>24.2 SD, 3.7</p> <p>Mean height 175.5 SD, 5.9 cm,</p> <p>leg length 90.0 SD, 3.0 cm</p> <p>Body mass 73.2 SD, 8.3 kg</p>  | <p>Two bipolar Ag/AgCl electrodes</p> <p>10mm diameter</p> <p>Placed 2cm apart in centre of rectus femoris muscle belly</p> <p>No skin preparation documented</p>          | <p>14 males, student population</p> <p>Treadmill Testing</p> <p>Recreational runners 8-10km/week</p> <p>Quadriceps</p> <p>Right leg</p>       | <p>There were two running tests, separated by at least one week to ensure fatigue-free initial conditions: one level running and the other at a decline angle of -4°.</p> <p>The running tests were performed on a treadmill. Prior to the running tests, the anaerobic threshold was determined for each subject by monitoring the respiratory data (as per study 9) in level running.</p> <p>Running was at a speed exceeding</p>                                                                                                                                                                                                                                                                                       | <p>Surface electrodes were placed on the quadriceps of the right leg. Five hemispherical markers of 2 cm diameter were used for optional motion capture for the kinematic segments of the lower limb.</p> <p>The markers were attached to the right leg in the sagittal plane to the greater femoral trochanter, the lateral condyle of femur, the lateral malleolus, below the lateral malleolus and opposite to the head of the fifth metatarsal.</p> <p>The average speed in both level and downhill running for all the 14 subjects was 3.53 m/s.</p> <p>Metabolic fatigue was not reached in downhill running. No</p>                                                                                                                                                                                                                                                                                                                                                                                                                                                                                           |

|  |  |  |  |                                                                                                                                                         |                                                                                                                                                                                                                                                                                                                                                                                                             |
|--|--|--|--|---------------------------------------------------------------------------------------------------------------------------------------------------------|-------------------------------------------------------------------------------------------------------------------------------------------------------------------------------------------------------------------------------------------------------------------------------------------------------------------------------------------------------------------------------------------------------------|
|  |  |  |  | <p>the anaerobic threshold speed of each subject by 5% and lasted 30 min. Before the test, a 15 min warm up running on the treadmill was performed.</p> | <p>significant changes in either iEMG or mean power frequencies MPF were noted in level running despite the fact that the anaerobic threshold was exceeded in this case and metabolic fatigue did develop. In downhill running,</p> <p>Statistically significant increases during running were noted in the quadriceps iEMG from the 20th min and onwards and in the MPF from the 15th min and onwards.</p> |
|--|--|--|--|---------------------------------------------------------------------------------------------------------------------------------------------------------|-------------------------------------------------------------------------------------------------------------------------------------------------------------------------------------------------------------------------------------------------------------------------------------------------------------------------------------------------------------------------------------------------------------|
